# Supplementary material for: Mobile phone as fomites and Hand hygiene. A survey of 544 attendees of the 2023 WONCA international conference in Sydney, Australia
Source: Research Square preprint supplement (doi:10.21203/rs.3.rs-4416044/v1), 2024-06-05
Supplement: Supplementary file 1 [file 6bbff5357e09218c8ad51599.docx]

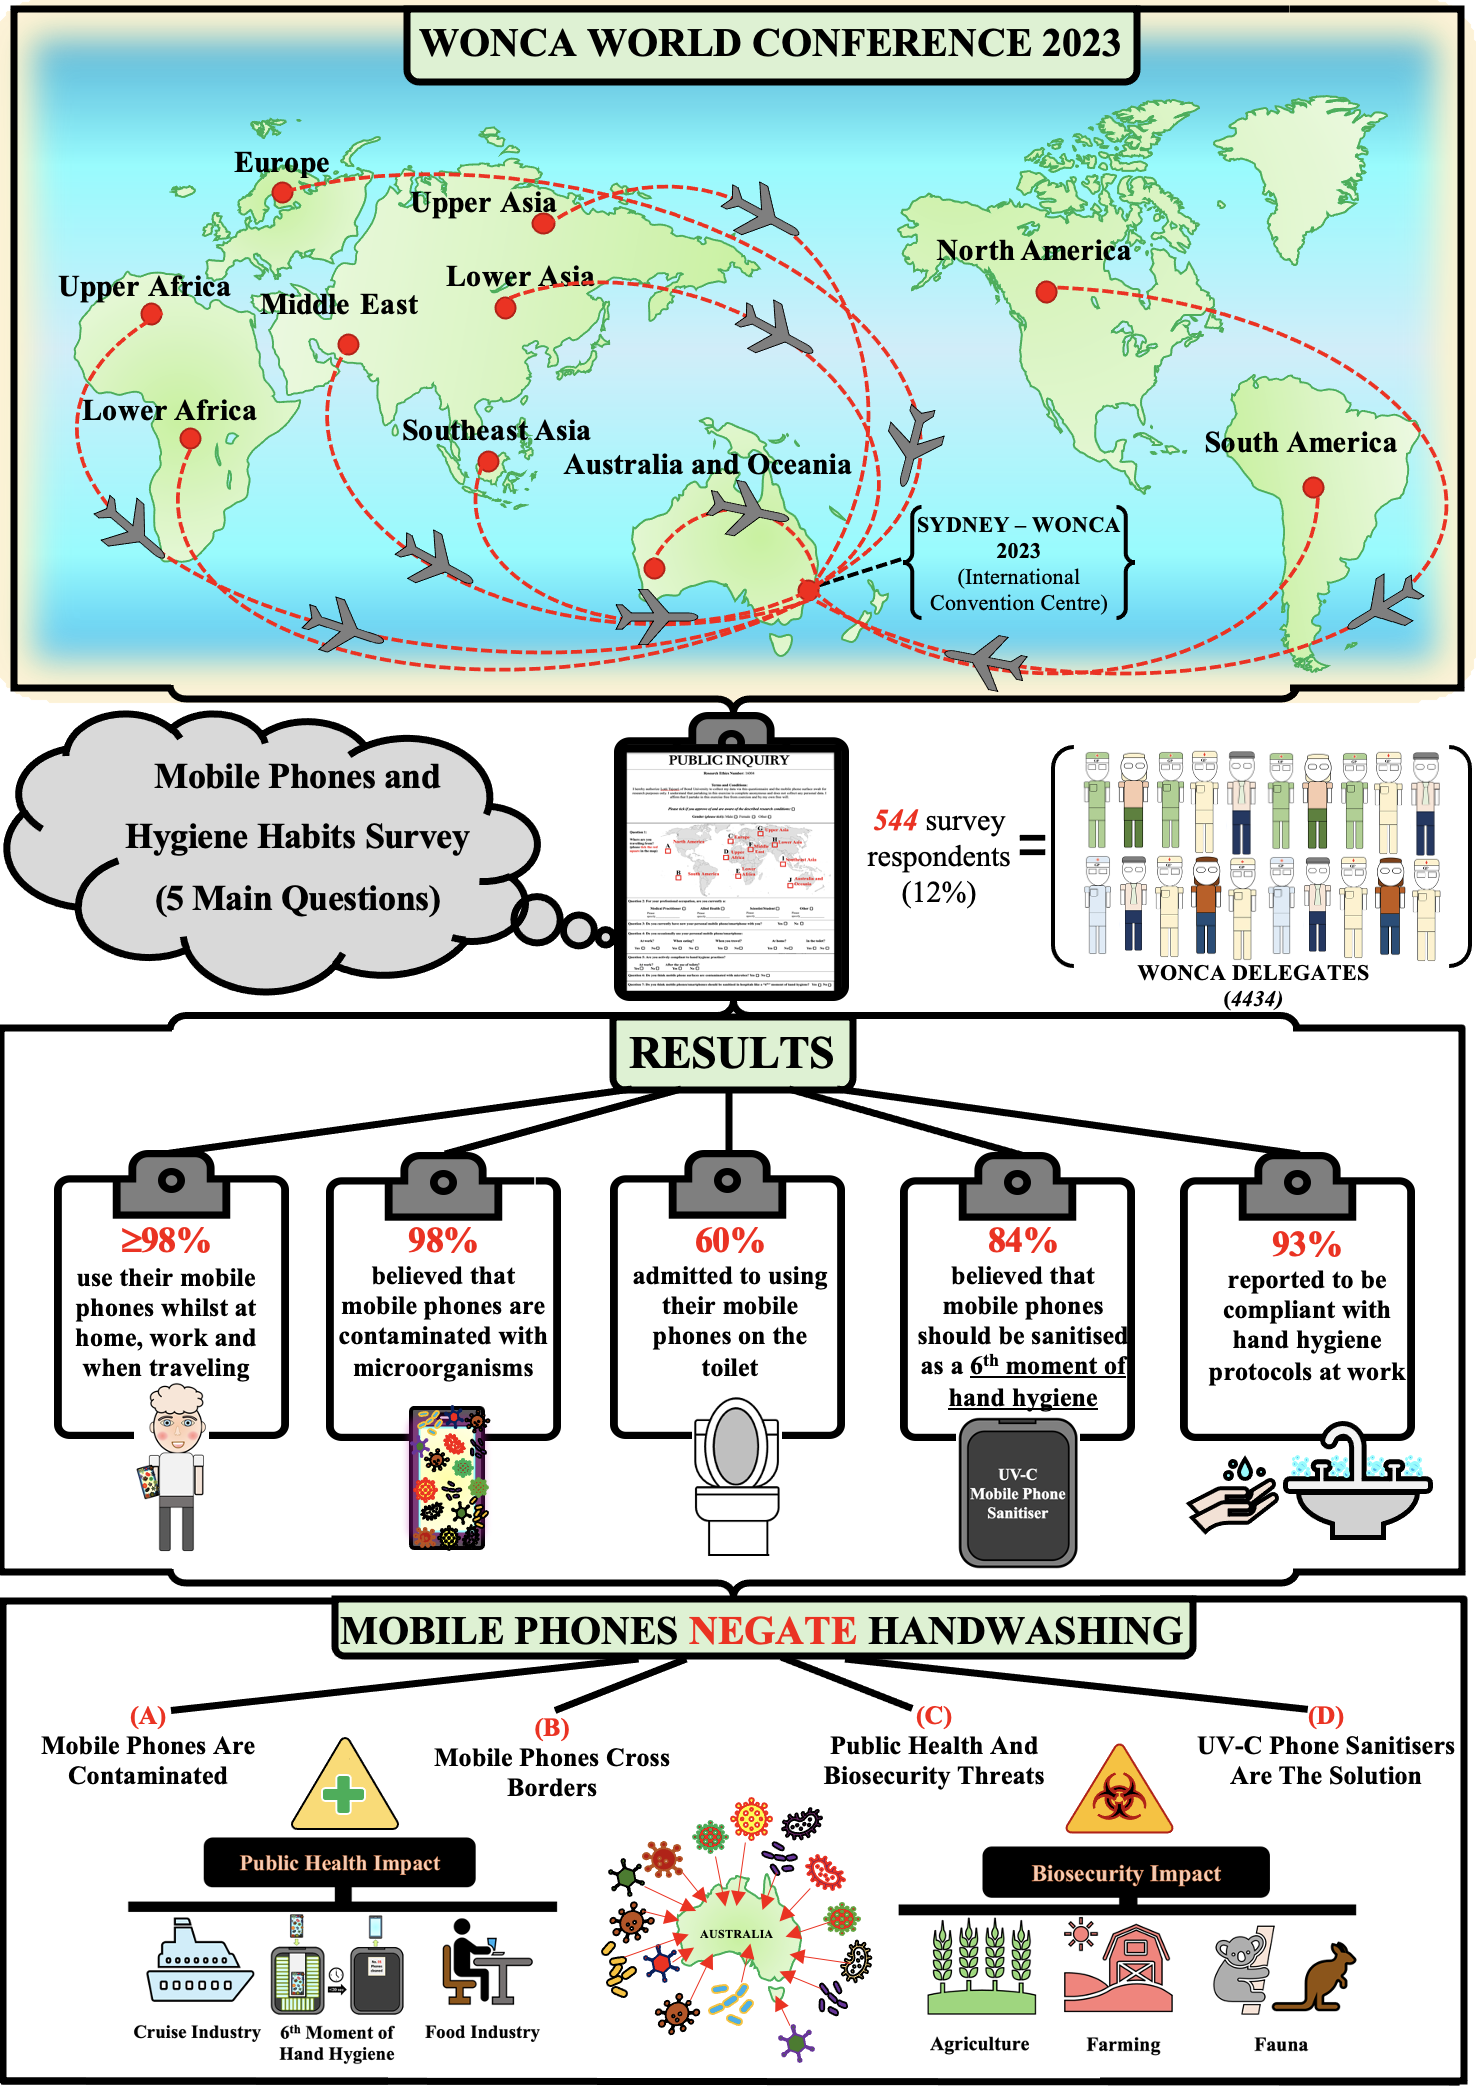


**Infographic 1*.*** *Overview of study illustrating the 5 key results and associated implications of non-sanitised mobile phones entering Australia.*
