# Supplementary figures and images for: Mobile phone as fomites and Hand hygiene. A survey of 544 attendees of the 2023 WONCA international conference in Sydney, Australia
Source: Research Square preprint supplement (doi:10.21203/rs.3.rs-4416044/v1), 2024-06-05

**Appendix 1 - Questionnaire**


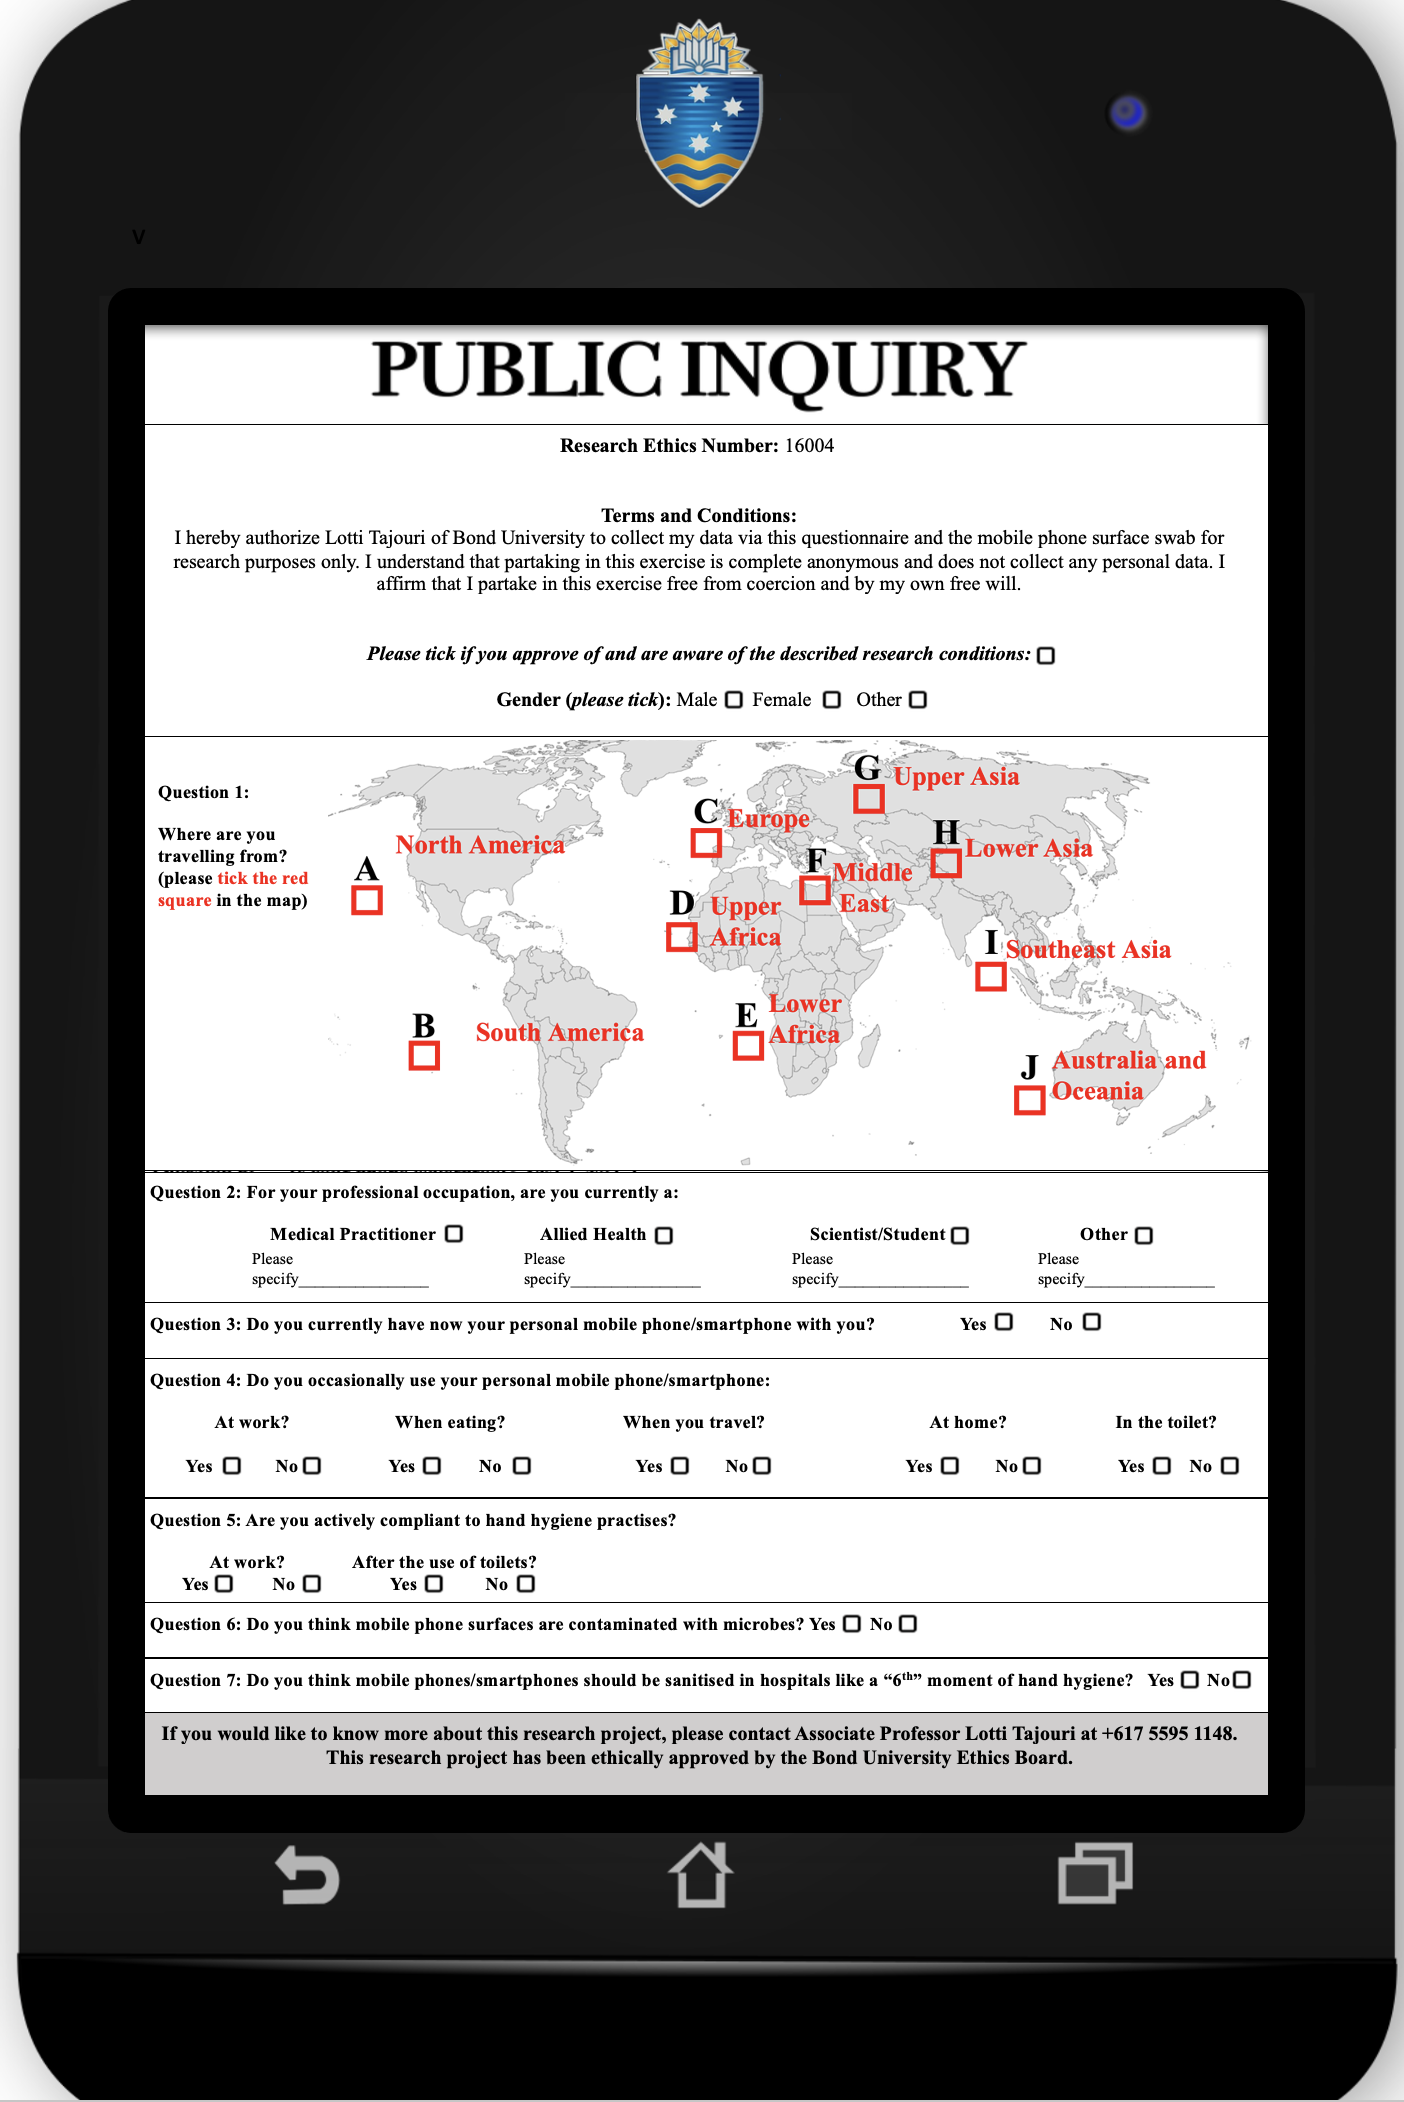

Supplement: Supplementary file 2 [file cf8d6da5b9a585b5ed7b5a38.docx]
